# Supplementary material
Source: PubMed Central journal article supplement (PMC7812137)

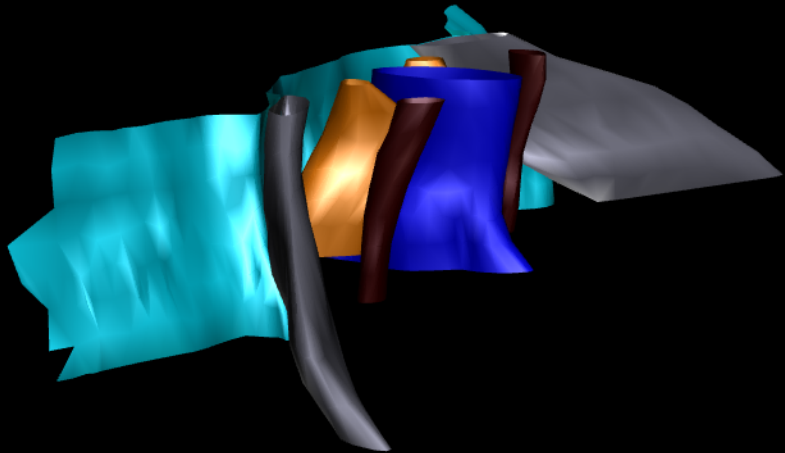

Supplement: JOA-238-467-s001.pdf [file JOA-238-467-s001.pdf]

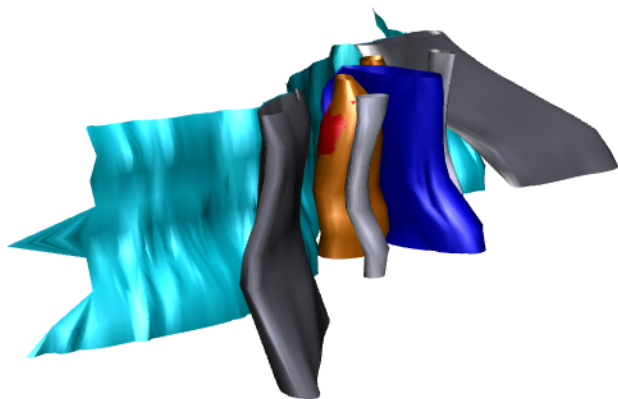

Supplement: JOA-238-467-s002.pdf [file JOA-238-467-s002.pdf]
